# Supplementary material for: Symphysis‐Fundal Height Curve in Pregnancies Complicated by Maternal Hyperglycemia: Comparison with Curves of Nondiabetic Pregnant Women
Source: Hindawi journal article supplement (doi:10.1155/2020/1908764), 2020-01-01
Supplement: f1 [file 1908764.f1.zip]

## Biomed Research International

### Symphysis-fundal height curve in pregnancies complicated by maternal hyperglycemia

– comparison with curves of non-diabetic pregnant women (#1908764)

#### Supplementary materials

**Table 1A.** Glycemic control assessed between 13 and 39 weeks among pregnant women with T2DM, GDM and MGH

| Weeks | # glucose tests | minimum | maximum | mean (mg/dL)   |
|-------|-----------------|---------|---------|----------------|
| 13    | 27              | 87.60   | 233.30  | 123.12         |
| 14    | 33              | 72.40   | 213.00  | 120.65         |
| 15    | 25              | 70.40   | 189.60  | <b>118.60</b>  |
| 16    | 35              | 87.90   | 186.00  | <b>117.11</b>  |
| 17    | 31              | 69.60   | 249.10  | <b>110.71</b>  |
| 18    | 33              | 67.30   | 170.30  | <b>109.62</b>  |
| 19    | 37              | 66.30   | 161.90  | <b>112.84</b>  |
| 20    | 40              | 69.70   | 216.80  | <b>116.52G</b> |
| 21    | 42              | 73.20   | 240.00  | <b>111.31</b>  |
| 22    | 46              | 80.00   | 170.80  | <b>115.08</b>  |
| 23    | 46              | 72.20   | 273.50  | 123.94         |
| 24    | 69              | 76.20   | 174.00  | <b>111.01</b>  |
| 25    | 76              | 76.30   | 180.80  | <b>112.06</b>  |
| 26    | 88              | 79.70   | 188.50  | <b>110.37</b>  |
| 27    | 83              | 75.10   | 334.70  | <b>113.62</b>  |
| 28    | 116             | 56.40   | 235.50  | <b>111.93</b>  |
| 29    | 89              | 79.20   | 157.30  | <b>108.89</b>  |
| 30    | 110             | 54.00   | 281.80  | <b>109.35</b>  |
| 31    | 109             | 72.00   | 198.00  | <b>109.56</b>  |
| 32    | 139             | 61.80   | 198.20  | <b>109.01</b>  |
| 33    | 145             | 76.80   | 236.30  | <b>106.53</b>  |
| 34    | 149             | 52.80   | 152.50  | <b>104.14</b>  |
| 35    | 167             | 67.40   | 180.90  | <b>100.91</b>  |
| 36    | 163             | 58.80   | 187.50  | <b>99.31</b>   |
| 37    | 124             | 64.10   | 138.00  | <b>98.38</b>   |
| 38    | 41              | 77.50   | 124.00  | <b>100.16</b>  |
| 39    | 11              | 81.10   | 106.30  | <b>94.46</b>   |

**Table 2A.** SFH expected value with upper and lower limits (95% CI) between 13 and 42 weeks or gestation among pregnant women with T2DM, GDM and MGH

| SFH = 1.082 + 0.966*semana    |              |       |       |
|-------------------------------|--------------|-------|-------|
| SFH (LL) = 0.629 + 0.95*week  |              |       |       |
| SFH (UL) = 1.535 + 0.981*week |              |       |       |
| 95%CI*                        |              |       |       |
| Week                          | Expected SFH | LL    | UL    |
| 13                            | 13.64        | 12.98 | 14.29 |
| 14                            | 14.61        | 13.93 | 15.27 |
| 15                            | 15.57        | 14.88 | 16.25 |
| 16                            | 16.54        | 15.83 | 17.23 |
| 17                            | 17.50        | 16.78 | 18.21 |
| 18                            | 18.47        | 17.73 | 19.19 |
| 19                            | 19.44        | 18.68 | 20.17 |
| 20                            | 20.40        | 19.63 | 21.16 |
| 21                            | 21.37        | 20.58 | 22.14 |
| 22                            | 22.33        | 21.53 | 23.12 |
| 23                            | 23.30        | 22.48 | 24.10 |
| 24                            | 24.27        | 23.43 | 25.08 |
| 25                            | 25.23        | 24.38 | 26.06 |
| 26                            | 26.20        | 25.33 | 27.04 |
| 27                            | 27.16        | 26.28 | 28.02 |
| 28                            | 28.13        | 27.23 | 29.00 |
| 29                            | 29.10        | 28.18 | 29.98 |
| 30                            | 30.06        | 29.13 | 30.97 |
| 31                            | 31.03        | 30.08 | 31.95 |
| 32                            | 31.99        | 31.03 | 32.93 |
| 33                            | 32.96        | 31.98 | 33.91 |
| 34                            | 33.93        | 32.93 | 34.89 |
| 35                            | 34.89        | 33.88 | 35.87 |
| 36                            | 35.86        | 34.83 | 36.85 |
| 37                            | 36.82        | 35.78 | 37.83 |
| 38                            | 37.79        | 36.73 | 38.81 |
| 39                            | 38.76        | 37.68 | 39.79 |
| 40                            | 39.72        | 38.63 | 40.78 |
| 41                            | 40.69        | 39.58 | 41.76 |
| 42                            | 41.65        | 40.53 | 42.74 |

\*LL = lower limit

UL = upper limit
