# Supplementary material for: Symphysis-Fundal Height Curve in Pregnancies Complicated by Maternal Hyperglycemia: Comparison with Curves of Nondiabetic Pregnant Women
Source: Biomed Res Int. 2020 Sep 1;2020:1908764. doi: 10.1155/2020/1908764 (PMC7481913; doi:10.1155/2020/1908764)
Supplement: Supplementary Materials — Table 1A: glycemic control assessed between 13 and 39 weeks among pregnant women with T2DM, GDM, and MGH. Table 2A: SFH expected value with upper and lower limits (95% CI) between 13 and 42 weeks or gestation among pregnant women with T2DM, GDM, and MGH. [file 1908764.f1.zip]

Archive with 2 entries (2 files):
- BioMedIntRes_Supplem mat_v. final_julho2020_BMRI_3121474.docx
- mat.1908764.v2.pdf
